# Supplementary material for: Electronic structure of the dicationic first row transition metal oxides
Source: Royal Society of Chemistry journal article supplement (doi:10.1039/d1cp02492b), 2021-01-01
Supplement: d1cp02492b1.pdf [file d1cp02492b1.pdf]

# Electronic Supplementary Information

## Electronic Structure of the dicationic first row transition metal oxides

*Emily E. Claveau and Evangelos Miliordos\**

Department of Chemistry and Biochemistry, Auburn University, Auburn, AL 36849-5312, USA

### **Corresponding Author**

\* E-mail: [emiliord@auburn.edu](mailto:emiliord@auburn.edu)

**Table S1.** Equilibrium bond length  $r_e$  (Å), equilibrium energy  $E_e$  (a.u.), harmonic vibrational frequency  $\omega_e$  ( $\text{cm}^{-1}$ ), anharmonicity  $\omega_e x_e$  ( $\text{cm}^{-1}$ ), and  $\Delta G_{1/2}$  ( $\text{cm}^{-1}$ ) for the ground electronic state of  $\text{MO}^{2+}$ ,  $M = \text{Ti} - \text{Cu}$ , at MRCI / cc-pVnZ(M) aug-cc-pVnZ(O) and C-MRCI / cc-pwCVnZ(M) aug-cc-pVnZ(O) [ $n = \infty$  signifies complete basis set or CBS limit].

| $n$                                                        | $r_e$ | $-E_e$      | $\omega_e$ | $\omega_e x_e$ | $\Delta G_{1/2}$ | $r_e$ | $-E_e$      | $\omega_e$ | $\omega_e x_e$ | $\Delta G_{1/2}$ |
|------------------------------------------------------------|-------|-------------|------------|----------------|------------------|-------|-------------|------------|----------------|------------------|
| MRCI                                                       |       |             |            |                | C-MRCI           |       |             |            |                |                  |
| <b>TiO<sup>2+</sup> / <math>\tilde{X}^1\Sigma^+</math></b> |       |             |            |                |                  |       |             |            |                |                  |
| 3                                                          | 1.558 | 922.874470  | 1050       | 3.7            | 1048             | 1.546 | 923.192919  | 1073       | 4.9            | 1064             |
| 4                                                          | 1.556 | 922.894823  | 1054       | 3.3            | 1052             | 1.541 | 923.224779  | 1081       | 4.9            | 1073             |
| 5                                                          | 1.554 | 922.901860  | 1057       | 3.2            | 1055             | 1.540 | 923.237170  | 1084       | 4.9            | 1076             |
| $\infty$                                                   | 1.553 | 922.905776  | 1050       | 3.4            | 1049             | 1.539 | 923.245468  | 1078       | 4.8            | 1069             |
| <b>VO<sup>2+</sup> / <math>\tilde{X}^2\Delta</math></b>    |       |             |            |                |                  |       |             |            |                |                  |
| 3                                                          | 1.542 | 1017.317128 | 1014       | 6.0            | 1004             | 1.533 | 1017.658511 | 1029       | 5.8            | 1021             |
| 4                                                          | 1.538 | 1017.338897 | 1022       | 5.5            | 1013             | 1.529 | 1017.694019 | 1034       | 5.2            | 1026             |
| 5                                                          | 1.536 | 1017.346254 | 1026       | 5.4            | 1017             | 1.527 | 1017.707651 | 1038       | 5.2            | 1030             |
| $\infty$                                                   | 1.535 | 1017.350196 | 1027       | 5.3            | 1019             | 1.526 | 1017.716724 | 1040       | 5.1            | 1032             |
| <b>CrO<sup>2+</sup> / <math>\tilde{X}^3\Sigma^-</math></b> |       |             |            |                |                  |       |             |            |                |                  |
| 3                                                          | 1.541 | 1118.002155 | 947        | 13.2           | 919              | 1.535 | 1118.074084 | 948        | 13.3           | 920              |
| 4                                                          | 1.529 | 1118.073063 | 966        | 13.3           | 940              | 1.535 | 1118.112704 | 965        | 13.4           | 939              |
| 5                                                          | 1.529 | 1118.109357 | 972        | 13.2           | 947              | 1.527 | 1118.128122 | 971        | 13.3           | 946              |
| $\infty$                                                   | 1.528 | 1118.150692 | 970        | 13.2           | 944              | 1.528 | 1118.138559 | 975        | 13.3           | 950              |
| <b>MnO<sup>2+</sup> / <math>\tilde{X}^4\Sigma^-</math></b> |       |             |            |                |                  |       |             |            |                |                  |
| 3                                                          | 2.205 | 1224.201244 | 311        | 2.2            | 306              | 2.191 | 1224.567045 | 316        | 2.3            | 311              |
| 4                                                          | 2.194 | 1224.223710 | 315        | 2.3            | 311              | 2.182 | 1224.607660 | 321        | 2.4            | 316              |
| 5                                                          | 2.191 | 1224.230600 | 316        | 2.3            | 312              | 2.179 | 1224.623200 | 322        | 2.4            | 318              |
| $\infty$                                                   | 2.187 | 1224.235232 | 315        | 1.9            | 312              | 2.172 | 1224.635534 | 322        | 1.8            | 319              |
| <b>CoO<sup>2+</sup> / <math>\tilde{X}^6\Phi</math></b>     |       |             |            |                |                  |       |             |            |                |                  |
| 3                                                          | 2.117 | 1455.809494 | 373        | 2.5            | 369              | 2.115 | 1456.198532 | 376        | 2.5            | 373              |
| 4                                                          | 2.108 | 1455.842264 | 380        | 2.7            | 374              | 2.107 | 1456.250973 | 384        | 2.8            | 379              |
| 5                                                          | 2.105 | 1455.854326 | 382        | 2.7            | 376              | 2.104 | 1456.272542 | 386        | 2.8            | 381              |
| $\infty$                                                   | 2.110 | 1455.862149 | 382        | 2.6            | 377              | 2.103 | 1456.288614 | 386        | 2.6            | 381              |

| <b>NiO<sup>2+</sup> / <math>\tilde{X}^5\Delta</math></b>   |       |             |     |     |     |       |             |     |     |     |
|------------------------------------------------------------|-------|-------------|-----|-----|-----|-------|-------------|-----|-----|-----|
| 3                                                          | 2.035 | 1581.306277 | 391 | 2.8 | 385 | 2.038 | 1581.700059 | 393 | 2.8 | 388 |
| 4                                                          | 2.027 | 1581.344726 | 396 | 2.9 | 391 | 2.032 | 1581.759039 | 400 | 2.9 | 394 |
| 5                                                          | 2.025 | 1581.359200 | 398 | 2.9 | 392 | 2.029 | 1581.783500 | 401 | 2.9 | 396 |
| $\infty$                                                   | 2.023 | 1581.368956 | 399 | 2.8 | 393 | 2.027 | 1581.802144 | 402 | 2.8 | 396 |
| <b>CuO<sup>2+</sup> / <math>\tilde{X}^4\Sigma^-</math></b> |       |             |     |     |     |       |             |     |     |     |
| 3                                                          | 1.954 | 1713.436267 | 408 | 2.4 | 403 | 1.961 | 1713.830091 | 409 | 2.5 | 404 |
| 4                                                          | 1.946 | 1713.479521 | 414 | 2.4 | 409 | 1.953 | 1713.895522 | 415 | 2.5 | 410 |
| 5                                                          | 1.945 | 1713.496299 | 415 | 2.4 | 410 | 1.951 | 1713.922793 | 416 | 2.5 | 411 |
| $\infty$                                                   | 1.943 | 1713.507893 | 416 | 2.4 | 411 | 1.949 | 1713.943482 | 416 | 2.4 | 411 |

---

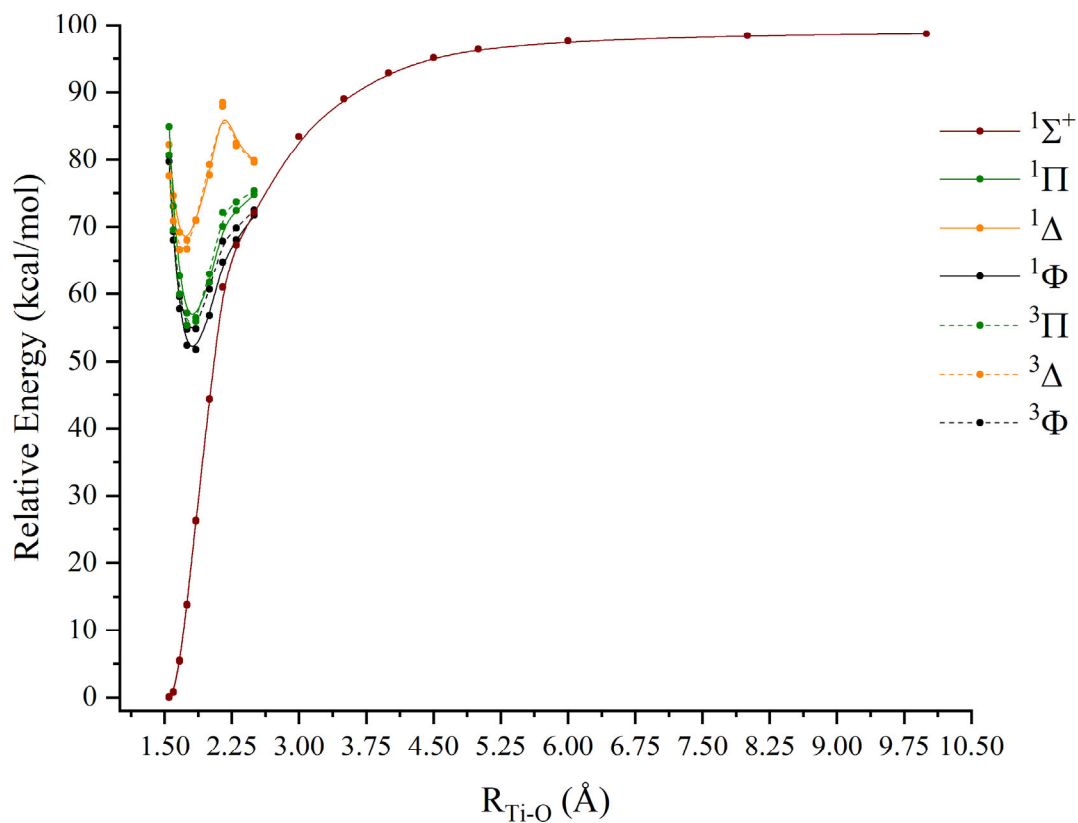

**Figure S1.** CASSCF PECs for the ground electronic state of FeO<sup>2+</sup> from equilibrium to complete dissociation. PECs for the lowest lying excited electronic states are also shown in the avoided crossing region.

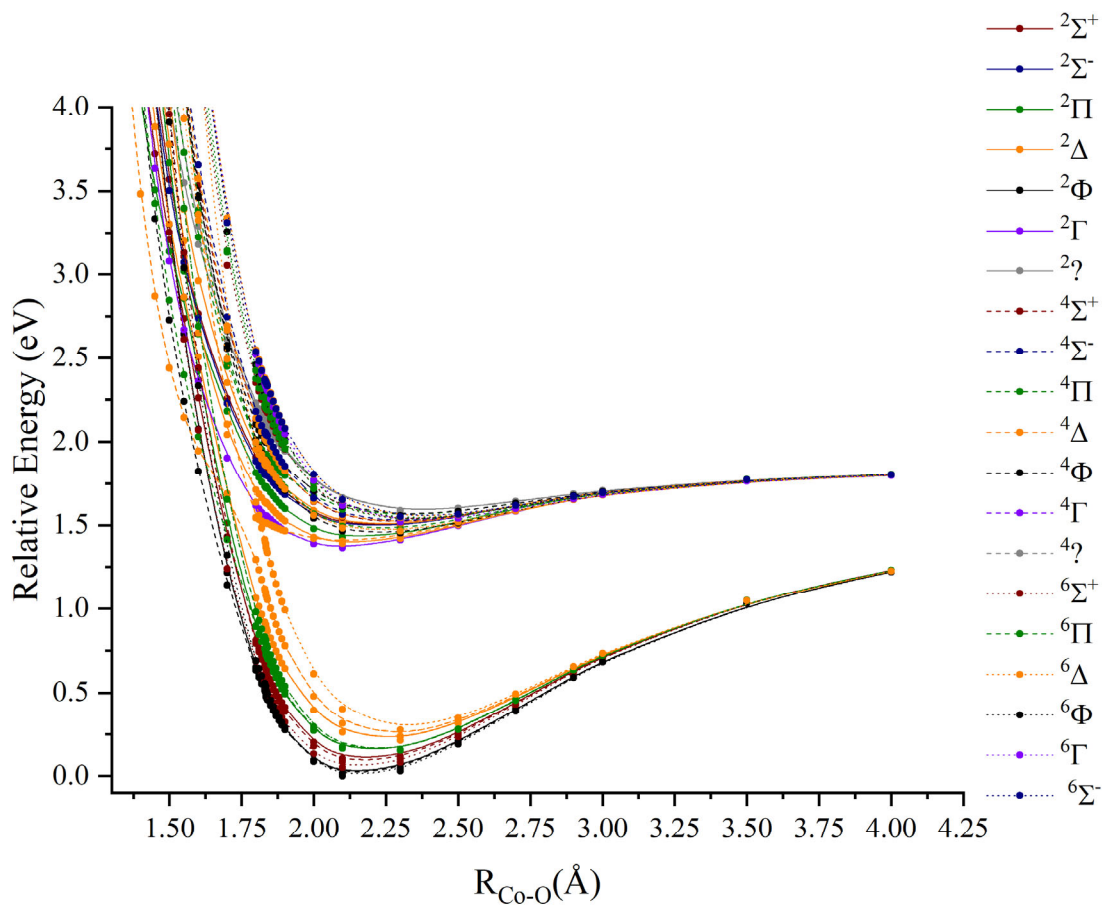

**Figure S2.** CASSCF PECs for numerous excited electronic states of  $\text{CoO}^{2+}$ .

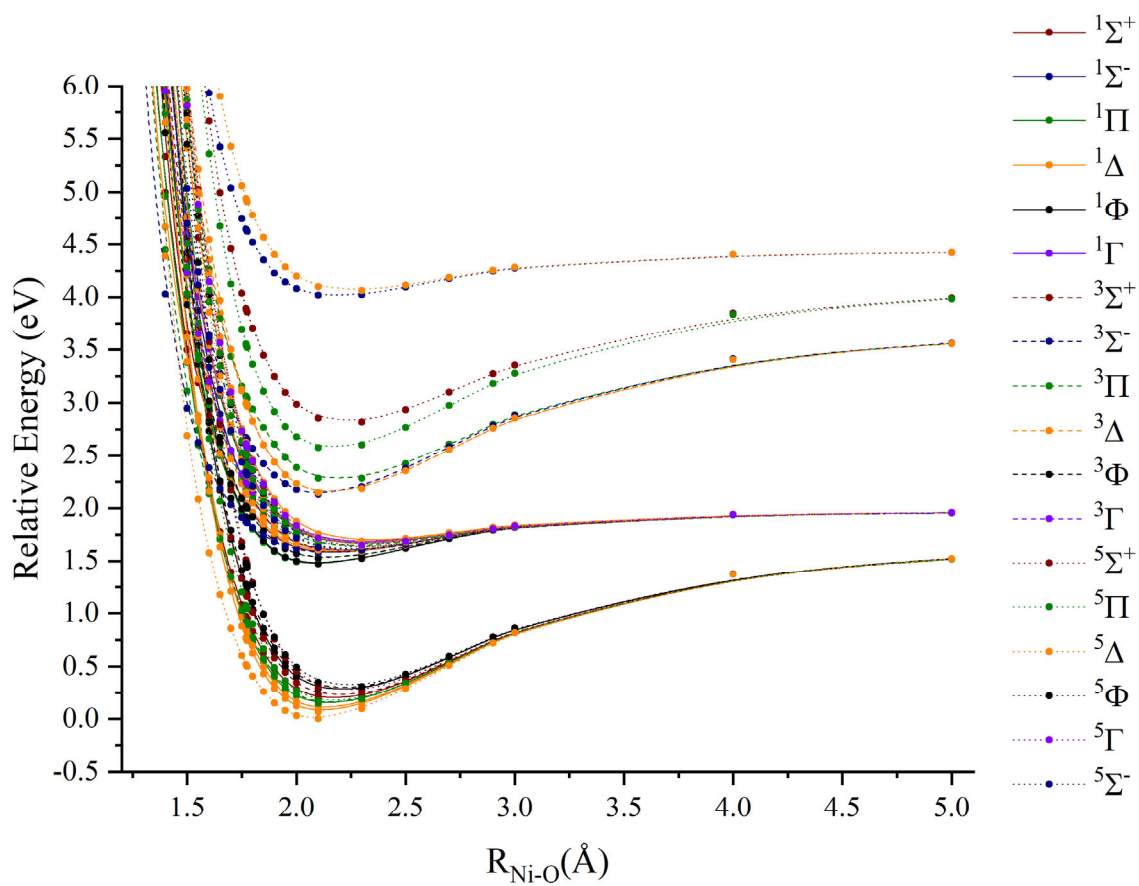

**Figure S3.** CASSCF PECs for numerous excited electronic states of  $\text{NiO}^{2+}$ .

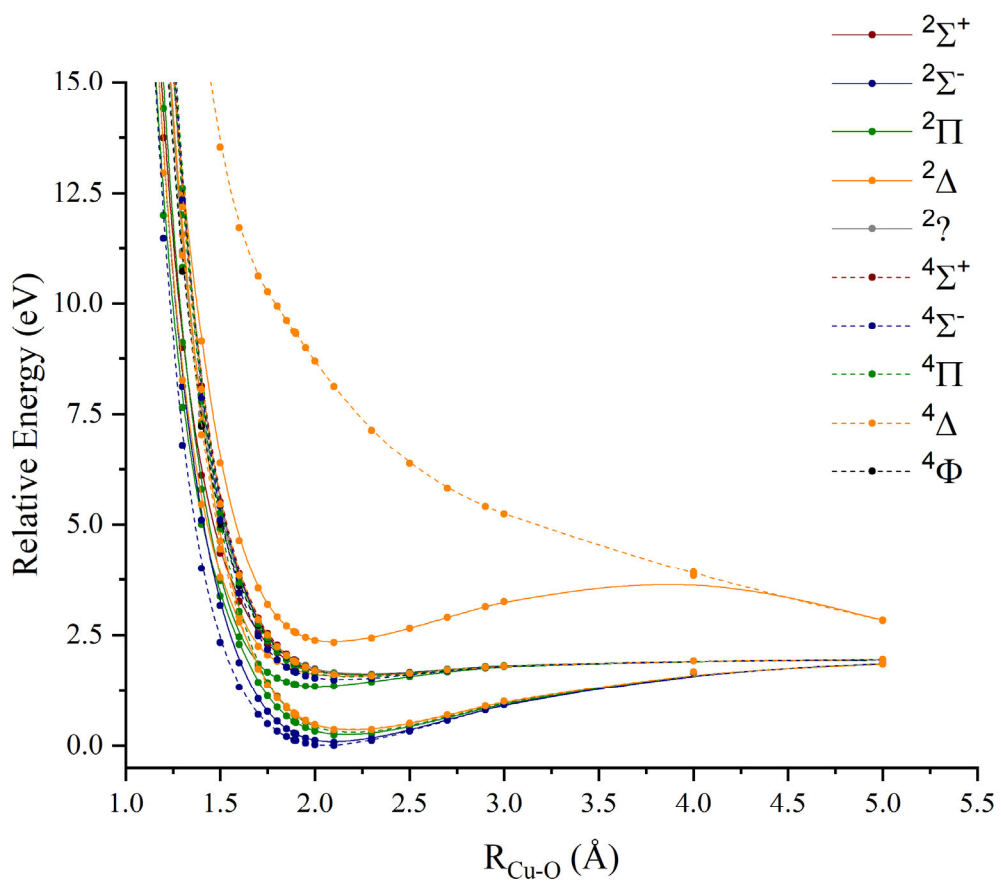

**Figure S4.** CASSCF PECs for numerous excited electronic states of  $\text{CuO}^{2+}$ .
